# Supplementary material for: Molecular Signatures of Prostate Stem Cells Reveal Novel Signaling Pathways and Provide Insights into Prostate Cancer
Source: PubMed Central journal article supplement (PMC2684642; doi:10.1371/journal.pone.0005722), 2009-05-29
Supplement: pone.0005722.s012.pdf [file pone.0005722.s012.pdf]

Top

| <b>Table S11. Comparison of gene expression in primitive prostate cell populations as determined by quantitative PCR</b> |        |            |            |            |
|--------------------------------------------------------------------------------------------------------------------------|--------|------------|------------|------------|
| Category                                                                                                                 | Gene   | UGE        | Sca-1Hi    | Sca-1Lo    |
| Cell cycle/<br>Self-renewal                                                                                              | Wnt4   | 5.0 ± 0.4  | 8.4 ± 0.6  | 2.7 ± 0.1  |
|                                                                                                                          | Wnt6   | 22.4 ± 4.6 | 1.2 ± 0.3  | 1.5 ± 0.6  |
|                                                                                                                          | Fzd6   | 5.0 ± 0.4  | 3.4 ± 0.2  | 3.0 ± 0.1  |
|                                                                                                                          | Shh    | 35.3 ± 5.9 | 6.3 ± 0.8  | 4.1 ± 1.4  |
|                                                                                                                          | Gli3   | 3.7 ± 0.2  | 2.9 ± 0.9  | 2.5 ± 0.2  |
|                                                                                                                          | E2f3   | 3.4 ± 0.2  | 1.3 ± 0.1  | 1.1 ± 0.1  |
|                                                                                                                          | Cdc2a  | 12.1 ± 1.8 | 0.7 ± 0.1  | 1.0 ± 0.5  |
|                                                                                                                          | Tead2  | 4.1 ± 0.8  | 0.4 ± 0.1  | 0.9 ± 0.3  |
| TGF-β pathway                                                                                                            | Clu    | 0.1 ± 0.1  | 3.4 ± 0.9  | 2.5 ± 0.2  |
| Ahr pathway                                                                                                              | Ahr    | 2.4 ± 0.1  | 3.5 ± 0.2  | 1.8 ± 0.2  |
| RA pathway                                                                                                               | Crabp2 | 46.6 ± 3.9 | 1.2 ± 0.2  | 2.3 ± 0.4  |
|                                                                                                                          | Rxra   | 4.2 ± 0.4  | 3.3 ± 0.1  | 1.8 ± 0.4  |
|                                                                                                                          | Rarb   | 2.8 ± 0.3  | 1.8 ± 0.1  | 1.3 ± 0.1  |
|                                                                                                                          | Rarg   | 1.5 ± 0.4  | 3.0 ± 0.2  | 2.2 ± 0.1  |
| Phospholipid                                                                                                             | Pltp   | 1.7 ± 0.3  | 8.1 ± 2.2  | 5.9 ± 1.3  |
| Calcium regulators                                                                                                       | Itpr3  | 0.7 ± 0.1  | 1.7 ± 0.3  | 1.1 ± 0.3  |
|                                                                                                                          | Thbd   | 1.5 ± 1.9  | 20.3 ± 6.0 | 10.3 ± 4.5 |
| Chromatin modifiers                                                                                                      | Ezh2   | 4.4 ± 0.4  | 1.7 ± 0.1  | 1.3 ± 0.1  |

qPCR analysis of selected genes from functional categories that were identified in primitive prostate cells. Transcript levels were normalized to the expression of HPRT (housekeeping gene). Data [mean ± SD, n=3] are presented as the fold change of the expression of each gene in UGE, Sca-1Hi or Sca-1Lo cells relative to its expression in Sca-1Neg cells.

Wilson et al. Table S11
