# Supplementary material for: Molecular Signatures of Prostate Stem Cells Reveal Novel Signaling Pathways and Provide Insights into Prostate Cancer
Source: PLoS One. 2009 May 29;4(5):e5722. doi: 10.1371/journal.pone.0005722 (PMC2684642; doi:10.1371/journal.pone.0005722)
Supplement: Table S4 — Markers currently described as being expressed in primitive prostate cells and housekeeping genes. The upper half of the table presents transcripts of known prostate stem cell markers that were significantly highly expressed in the stem/progenitor subsets. The lower half of the table presents transcripts of known housekeeping genes and indicates that their expression was not altered between the subsets. (0.04 MB XLS) [file pone.0005722.s005.xls]

## Sheet: PSC markers and HK genes
Probe Set ID	Gene Title	Gene Symbol	Unigene(Avadis)	GO(Avadis)	Label	UGE1	UGE2	UGE3	SChi1	SChi3	SChi4	SClo1	SClo2	SClo4	SClo5	SCng1	SCng2	SCng4	SCng5	Chromosome Number(Avadis)	Chromosome Start Index(Avadis)	Chromosome End Index(Avadis)	Entrez Gene	Ensembl
1450008_a_at	catenin (cadherin associated protein), beta 1	Ctnnb1	Mm.291928	GO:0000122|GO:0000904|GO:0001501|GO:0001569|GO:0001706|GO:0001708|GO:0001709|GO:0001711|GO:0006350|GO:0006355|GO:0006355|GO:0007155|GO:0007268|GO:0007398|GO:0007507|GO:0009950|GO:0009953|GO:0009954|GO:0009987|GO:0010003|GO:0016055|GO:0016055|GO:0016331|GO:0016337|GO:0030097|GO:0030154|GO:0030316|GO:0030324|GO:0030858|GO:0030900|GO:0031016|GO:0035116|GO:0035117|GO:0042127|GO:0042475|GO:0042733|GO:…	Known Prostate SC gene	1.17958	1.95916	1.96258	-0.221769	0.754893	0.807762	-0.20068	-0.179958	0.677711	0.606382	-0.0797605	-0.668314	0.189565	0.55851	chr9	120782186	120809205	12387	ENSMUSG00000006932
1427048_at	smoothened homolog (Drosophila)	Smo	Mm.29279	GO:0001570|GO:0001649|GO:0001755|GO:0002052|GO:0003007|GO:0007165|GO:0007166|GO:0007186|GO:0007224|GO:0007275|GO:0007368|GO:0007389|GO:0007417|GO:0008284|GO:0009953|GO:0021696|GO:0021938|GO:0021953|GO:0042475|GO:0043066|GO:0043392|GO:0048468|GO:0048589|GO:0005929|GO:0016020|GO:0016020|GO:0016021|GO:0004871|GO:0004872|GO:0004926|GO:0004930	Known Prostate SC gene	1.21994	2.2878	1.76541	-0.453583	0.223822	0.450941	-1.06004	-0.984184	0.589966	1.14856	-0.168817	-0.637067	-0.633783	1.43966	chr6	29705297	29711370	319757	ENSMUSG00000001761
1427049_s_at	smoothened homolog (Drosophila)	Smo	Mm.29279	GO:0001570|GO:0001649|GO:0001755|GO:0002052|GO:0003007|GO:0007165|GO:0007166|GO:0007186|GO:0007224|GO:0007275|GO:0007368|GO:0007389|GO:0007417|GO:0008284|GO:0009953|GO:0021696|GO:0021938|GO:0021953|GO:0042475|GO:0043066|GO:0043392|GO:0048468|GO:0048589|GO:0005929|GO:0016020|GO:0016020|GO:0016021|GO:0004871|GO:0004872|GO:0004926|GO:0004930	Known Prostate SC gene	1.43771	2.09195	1.65185	-0.110951	0.260113	0.606198	-0.526608	-0.987115	0.809547	1.21007	-0.393308	-0.395657	-0.513065	1.30203	chr6	29705297	29711370	319757	ENSMUSG00000001761
1452514_a_at	kit oncogene	Kit	Mm.247073	GO:0006468|GO:0006468|GO:0006935|GO:0007169|GO:0007243|GO:0007281|GO:0008284|GO:0009314|GO:0009987|GO:0016310|GO:0018108|GO:0019221|GO:0030097|GO:0030154|GO:0043406|GO:0043473|GO:0046777|GO:0048066|GO:0009897|GO:0016020|GO:0016021|GO:0016021|GO:0000166|GO:0004672|GO:0004713|GO:0004714|GO:0004872|GO:0005020|GO:0005515|GO:0005524|GO:0016301|GO:0016740	Known Prostate SC gene	2.15229	2.35378	2.58209	-0.780756	-1.12108	-0.998978	-0.852462	-0.874235	-0.550403	-0.347753	0.109874	0.129544	-0.940589	0.701172	chr5	75930790	75938391	16590	ENSMUSG00000005672
1440770_at	B-cell leukemia/lymphoma 2	Bcl2	Mm.257460	GO:0001836|GO:0006915|GO:0006915|GO:0006916|GO:0006916|GO:0008284|GO:0031069|GO:0042981|GO:0043066|GO:0043473|GO:0043524|GO:0045069|GO:0046902|GO:0051881|GO:0005739|GO:0005783|GO:0005829|GO:0016020|GO:0016021|GO:0005515|GO:0046982	Known Prostate SC gene	0.687909	3.15847	2.43258	1.20238	2.819	1.96206	0.380468	-0.506979	1.88758	0.872999	-0.328829	-0.181571	-0.0262823	0.536683	chr1	108537877	108538201	12043
1443837_x_at	B-cell leukemia/lymphoma 2	Bcl2	Mm.257460	GO:0001836|GO:0006915|GO:0006915|GO:0006916|GO:0006916|GO:0008284|GO:0031069|GO:0042981|GO:0043066|GO:0043473|GO:0043524|GO:0045069|GO:0046902|GO:0051881|GO:0005739|GO:0005783|GO:0005829|GO:0016020|GO:0016021|GO:0005515|GO:0046982	Known Prostate SC gene	1.38066	4.00442	3.08257	2.22378	3.94493	3.20209	1.6598	0.486357	2.61986	2.00235	-0.955588	-0.71579	0.921478	0.749899	chr1	108539326	108539564	12043
1423935_x_at	keratin 14	Krt14	Mm.439898	GO:0000902|GO:0007010|GO:0008544|GO:0005882|GO:0045095|GO:0005198|GO:0005200|GO:0005515	Known Prostate SC gene	2.21493	3.24474	2.45456	1.90842	3.00077	2.57725	2.39313	1.98188	3.97392	3.98339	-0.898831	-1.80254	1.84151	0.859859	chr11	100019251	100023739	16664	ENSMUSG00000045545
1460347_at	keratin 14	Krt14	Mm.439898	GO:0000902|GO:0007010|GO:0008544|GO:0005882|GO:0045095|GO:0005198|GO:0005200|GO:0005515	Known Prostate SC gene	2.90718	3.20026	2.56073	1.47057	2.62002	2.45887	2.41343	2.1123	3.97097	3.97768	-0.9868	-1.71829	1.87803	0.827061	chr11	100019251	100023739	16664	ENSMUSG00000045545
1424096_at	keratin 5	Krt5	Mm.451847	GO:0000902|GO:0007010|GO:0008544|GO:0005882|GO:0005198|GO:0005200|GO:0005515	Known Prostate SC gene	3.20574	3.69565	3.42086	3.15385	3.68193	3.84406	2.7604	1.66045	3.43317	3.41118	-0.733878	-1.59303	1.61263	0.714277	chr15	101535105	101540935	110308	ENSMUSG00000061527
1418158_at	transformation related protein 63	Trp63	Mm.20894	GO:0001501|GO:0001736|GO:0001738|GO:0001942|GO:0002053|GO:0006350|GO:0006355|GO:0006355|GO:0006915|GO:0006915|GO:0006916|GO:0006917|GO:0007049|GO:0007219|GO:0007275|GO:0007275|GO:0007389|GO:0007499|GO:0009887|GO:0030154|GO:0030216|GO:0030859|GO:0031069|GO:0042475|GO:0042981|GO:0045786|GO:0045944|GO:0048745|GO:0060157|GO:0005634|GO:0005634|GO:0005634|GO:0003677|GO:0003677|GO:0003682|GO:0003700|GO:…	Known Prostate SC gene	3.01915	3.68187	3.48563	1.59585	2.89063	2.6338	2.06561	1.33619	3.85621	3.73083	-0.928339	-1.312	1.62987	0.610466	chr16	25717284	25807438	22061	ENSMUSG00000022510
1459581_at	transformation related protein 63	Trp63	Mm.20894	GO:0001501|GO:0001736|GO:0001738|GO:0001942|GO:0002053|GO:0006350|GO:0006355|GO:0006355|GO:0006915|GO:0006915|GO:0006916|GO:0006917|GO:0007049|GO:0007219|GO:0007275|GO:0007275|GO:0007389|GO:0007499|GO:0009887|GO:0030154|GO:0030216|GO:0030859|GO:0031069|GO:0042475|GO:0042981|GO:0045786|GO:0045944|GO:0048745|GO:0060157|GO:0005634|GO:0005634|GO:0005634|GO:0003677|GO:0003677|GO:0003682|GO:0003700|GO:…	Known Prostate SC gene	0.355289	2.91453	1.9248	3.22517	4.76915	4.18964	2.51864	0.718565	3.10063	2.43293	-0.552885	-1.23593	1.19619	0.592626	chr16	25736137	25736669	22061
1416072_at	CD34 antigen	Cd34	Mm.29798	GO:0007155|GO:0050900|GO:0009897|GO:0016020|GO:0016021|GO:0016021|GO:0005515	Known Prostate SC gene	-0.545445	-1.56432	-1.78416	2.50855	3.17449	4.05081	1.80081	1.71689	3.85756	4.33505	-0.20163	0.0104871	0.0417686	0.149374	chr1	196639614	196662008	12490	ENSMUSG00000016494
1422444_at	integrin alpha 6	Itga6	Mm.225096	GO:0007155|GO:0007160|GO:0007229|GO:0042475|GO:0046847|GO:0050900|GO:0050900|GO:0005886|GO:0008305|GO:0008305|GO:0016020|GO:0016021|GO:0016021|GO:0016323|GO:0004872|GO:0005509|GO:0005515	Known Prostate SC gene	-0.0439787	0.745432	0.295221	1.52107	1.90626	2.06461	1.41383	0.824714	1.89906	1.85484	-0.691427	-0.536117	0.773568	0.453975	chr2	71587796	71659262	16403	ENSMUSG00000027111
1422445_at	integrin alpha 6	Itga6	Mm.225096	GO:0007155|GO:0007160|GO:0007229|GO:0042475|GO:0046847|GO:0050900|GO:0050900|GO:0005886|GO:0008305|GO:0008305|GO:0016020|GO:0016021|GO:0016021|GO:0016323|GO:0004872|GO:0005509|GO:0005515	Known Prostate SC gene	0.474166	1.08826	0.800265	1.16394	1.50928	1.91645	1.16193	0.538885	1.79541	1.92045	-0.714233	-0.135815	0.582341	0.267709	chr2	71587796	71659262	16403
1434376_at	CD44 antigen	Cd44	Mm.423621	GO:0001658|GO:0002246|GO:0007155|GO:0009897|GO:0016020|GO:0016021|GO:0004872|GO:0005515|GO:0005515|GO:0005540|GO:0005540	Known Prostate SC gene	-1.83584	-2.84803	-1.75136	0.90959	1.21287	0.705307	0.422016	-0.141994	1.35945	1.03939	0.0647373	0.22367	-0.342734	0.0543261	chr2	102612048	102613358	12505	ENSMUSG00000005087
1448788_at	Cd200 antigen	Cd200	Mm.245851	GO:0016020|GO:0016021|GO:0016021|GO:0005515	Known Prostate SC gene	-1.50404	-1.93093	-1.61826	0.775471	1.3234	1.84603	0.285399	-0.243531	1.77162	1.86029	-0.063798	-0.301871	-0.969776	1.33544	chr16	45301458	45328338	17470
1415779_s_at	actin, gamma, cytoplasmic 1	Actg1	Mm.426706	GO:0045214|GO:0005737|GO:0005856|GO:0015629|GO:0030016|GO:0043034|GO:0000166|GO:0005198|GO:0005200|GO:0005200|GO:0005515|GO:0005524	Housekeeping gene	0.488939	0.663592	0.620789	0.208487	0.67477	0.696071	0.350193	-0.115995	0.716841	0.739628	-0.50746	-0.547304	0.476353	0.578412	chr11	120161783	120164578	11465	ENSMUSG00000059195 /// ENSMUSG00000062825
1436722_a_at	actin, beta, cytoplasmic	Actb	Mm.391967	GO:0005625|GO:0005737|GO:0005829|GO:0005856|GO:0000166|GO:0005198|GO:0005515|GO:0005524	Housekeeping gene	0.177758	0.490265	0.40665	-0.559764	0.535812	0.559091	-0.167336	-0.800156	0.471581	0.525122	-0.282771	-0.436986	0.0841417	0.635616	chr16	37802110	37802920	11461	ENSMUSG00000029580
AFFX-b-ActinMur/M12481_3_at	actin, beta, cytoplasmic	Actb	Mm.328431	GO:0005625|GO:0005737|GO:0005829|GO:0005856|GO:0000166|GO:0005198|GO:0005515|GO:0005524	Housekeeping gene	-0.0320559	0.326191	0.28021	-0.364834	0.335934	0.387812	-0.0377789	-0.777204	0.350898	0.381145	-0.282322	-0.372526	0.114713	0.540136				11461
AFFX-b-ActinMur/M12481_5_at	actin, beta, cytoplasmic	Actb	Mm.328431	GO:0005625|GO:0005737|GO:0005829|GO:0005856|GO:0000166|GO:0005198|GO:0005515|GO:0005524	Housekeeping gene	-0.0830021	-0.27081	-0.315983	-1.63282	0.24118	0.172319	-0.812787	-1.07847	-0.0639296	0.152395	0.0395737	-0.357631	-0.504574	0.822629				11461
AFFX-b-ActinMur/M12481_M_at	actin, beta, cytoplasmic	Actb	Mm.328431	GO:0005625|GO:0005737|GO:0005829|GO:0005856|GO:0000166|GO:0005198|GO:0005515|GO:0005524	Housekeeping gene	-0.146112	0.339932	0.159008	-1.1279	0.541913	0.528853	-0.518472	-1.1746	0.324594	0.509212	-0.258532	-0.509495	-0.154404	0.922429				11461
1435897_at	ribosomal protein L32	Rpl32	Mm.104368	GO:0006412|GO:0006412|GO:0006412|GO:0005622|GO:0005622|GO:0005840|GO:0005840|GO:0005842|GO:0005842|GO:0030529|GO:0003723|GO:0003735|GO:0003735|GO:0003735|GO:0005515	Housekeeping gene	0.475436	0.746212	0.310993	0.605168	0.215728	0.532702	1.10588	0.31209	0.564209	0.611484	-0.0361776	-0.560291	0.87742	-0.280947	chr6	115771130	115774358	19951	ENSMUSG00000057841
1416940_at	peptidylprolyl isomerase F (cyclophilin F)	Ppif	Mm.41656	GO:0006457|GO:0005615|GO:0005739|GO:0005739|GO:0003755|GO:0003755|GO:0016853|GO:0042277	Housekeeping gene	0.221531	0.656163	0.575107	-0.23021	0.30565	0.00633526	0.332007	0.455668	0.232615	-0.00944042	-0.367838	-0.786277	1.12376	0.0303612	chr14	24527340	24533652	105675	ENSMUSG00000021868
1417451_a_at	peptidylprolyl isomerase A	Ppia	Mm.5246	GO:0006457|GO:0030182|GO:0045069|GO:0005737|GO:0005829|GO:0003755|GO:0005515|GO:0016853|GO:0042277	Housekeeping gene	0.543418	0.660025	0.654205	0.289703	0.289	0.414596	0.364648	-0.116598	0.437229	0.471358	-0.226336	-0.513104	0.260754	0.478686	chr2	129441341	129442042	268373	ENSMUSG00000059583 /// ENSMUSG00000062933 /// ENSMUSG00000071866
1426688_at	succinate dehydrogenase complex, subunit A, flavoprotein (Fp)	Sdha	Mm.158231	GO:0006099|GO:0006118|GO:0006810|GO:0005739|GO:0005743|GO:0016020|GO:0000104|GO:0008177|GO:0016491|GO:0016627|GO:0050660	Housekeeping gene	-0.103376	0.338787	0.243028	-0.450096	-0.271398	-0.0149117	-0.206571	-0.447381	0.0469923	0.0325212	-0.308381	-0.71652	0.385677	0.639228	chr13	74788599	74816282	66945	ENSMUSG00000021577
1426689_s_at	succinate dehydrogenase complex, subunit A, flavoprotein (Fp)	Sdha	Mm.158231	GO:0006099|GO:0006118|GO:0006810|GO:0005739|GO:0005743|GO:0016020|GO:0000104|GO:0008177|GO:0016491|GO:0016627|GO:0050660	Housekeeping gene	-0.717862	-0.521871	-0.436524	-0.620697	-0.871343	-0.535313	-0.201439	-0.730235	-0.576884	-0.447214	-0.30039	-0.42699	0.0582743	0.669107	chr13	74788599	74816282	66945	ENSMUSG00000021577
1415702_a_at	C-terminal binding protein 1 /// similar to CtBP1 protein	Ctbp1 /// LOC100045360	Mm.7286	GO:0000122|GO:0008152|GO:0005667|GO:0005737|GO:0003700|GO:0005515|GO:0008134|GO:0016491|GO:0016616|GO:0048037|GO:0051287	Housekeeping gene	0.381733	0.945005	0.718838	-0.255325	-0.000665	0.0747433	0.064352	-0.434271	0.218472	0.330803	-0.395805	-0.647597	0.471498	0.571905	chr5	33564587	33591769	100045360 /// 13016	ENSMUSG00000037373
1448124_at	glucuronidase, beta	Gusb	Mm.3317	GO:0005975|GO:0005975|GO:0008152|GO:0005764|GO:0005764|GO:0005783|GO:0003824|GO:0004553|GO:0004553|GO:0004566|GO:0004566|GO:0016787|GO:0016787|GO:0016798|GO:0016798|GO:0043169	Housekeeping gene	-0.429907	0.0714598	-0.159826	-0.836679	-0.95043	-0.792919	-0.169354	-0.162487	-0.442995	-0.348982	-0.0982304	-0.00355053	0.289917	-0.188137	chr5	130273945	130287551	110006	ENSMUSG00000025534
1430332_a_at	glucuronidase, beta	Gusb	Mm.3317	GO:0005975|GO:0005975|GO:0008152|GO:0005764|GO:0005764|GO:0005783|GO:0003824|GO:0004553|GO:0004553|GO:0004566|GO:0004566|GO:0016787|GO:0016787|GO:0016798|GO:0016798|GO:0043169	Housekeeping gene	-0.166592	-0.332727	-0.642666	-0.414509	-0.870214	-0.665041	-0.0133467	0.18821	-0.420754	-0.759508	0.0279436	0.176165	0.291129	-0.495239	chr5	130284301	130287582	110006	ENSMUSG00000025534
1422311_a_at	polymerase (RNA) II (DNA directed) polypeptide A	Polr2a	Mm.16533	GO:0006350|GO:0006366|GO:0005634|GO:0005634|GO:0005665|GO:0005730|GO:0000287|GO:0003677|GO:0003677|GO:0003899|GO:0005515|GO:0008270|GO:0016740|GO:0016779|GO:0046872	Housekeeping gene	0.285245	-0.531592	-0.452083	0.441487	-0.0867639	-0.0551586	0.28052	0.530286	-0.181959	-0.222096	0.121431	0.538998	-0.18002	-0.480409	chr11	69550604	69574418	20020	ENSMUSG00000005198
1426242_at	polymerase (RNA) II (DNA directed) polypeptide A	Polr2a	Mm.16533	GO:0006350|GO:0006366|GO:0005634|GO:0005634|GO:0005665|GO:0005730|GO:0000287|GO:0003677|GO:0003677|GO:0003899|GO:0005515|GO:0008270|GO:0016740|GO:0016779|GO:0046872	Housekeeping gene	0.275462	1.05302	0.982318	0.220743	0.0205174	0.463309	0.201739	-0.284397	-0.0351181	0.247651	-0.511843	-0.582252	0.458725	0.635367	chr11	69550191	69574488	20020	ENSMUSG00000005198
1422966_a_at	transferrin receptor	Tfrc	Mm.28683	GO:0006879|GO:0006897|GO:0005576|GO:0005768|GO:0005768|GO:0005886|GO:0016020|GO:0016021|GO:0016023|GO:0016023|GO:0048471|GO:0004872|GO:0004998|GO:0005381	Housekeeping gene	-0.0929322	0.272878	-0.24838	-0.00643539	-0.116828	-0.0137067	0.239305	0.303229	0.0891085	-0.0968804	0.0531821	0.311944	-0.0245218	-0.340605	chr16	32528697	32550335	22042	ENSMUSG00000022797
1422967_a_at	transferrin receptor	Tfrc	Mm.28683	GO:0006879|GO:0006897|GO:0005576|GO:0005768|GO:0005768|GO:0005886|GO:0016020|GO:0016021|GO:0016023|GO:0016023|GO:0048471|GO:0004872|GO:0004998|GO:0005381	Housekeeping gene	-0.140798	0.720974	-0.139957	-0.121758	-0.311474	0.228954	-0.0826783	-0.0532193	0.00545454	0.104032	-0.116529	0.302255	-0.0996203	-0.0861053	chr16	32528697	32550335	22042	ENSMUSG00000022797
AFFX-TransRecMur/X57349_3_at	transferrin receptor	Tfrc	Mm.28683	GO:0006879|GO:0006897|GO:0005576|GO:0005768|GO:0005768|GO:0005886|GO:0016020|GO:0016021|GO:0016023|GO:0016023|GO:0048471|GO:0004872|GO:0004998|GO:0005381	Housekeeping gene	-0.256511	-0.227039	-0.443756	-0.0706992	-0.154794	-0.359539	-0.0902004	0.0509939	-0.371445	-0.427583	0.0238996	0.42974	-0.166823	-0.286817				22042
AFFX-TransRecMur/X57349_5_at	transferrin receptor	Tfrc	Mm.28683	GO:0006879|GO:0006897|GO:0005576|GO:0005768|GO:0005768|GO:0005886|GO:0016020|GO:0016021|GO:0016023|GO:0016023|GO:0048471|GO:0004872|GO:0004998|GO:0005381	Housekeeping gene	0.218881	-0.0773215	-0.222181	0.365181	-0.434367	-0.188416	0.117678	0.44719	-0.14184	-0.175783	0.428148	0.492516	-0.425745	-0.494917				22042
AFFX-TransRecMur/X57349_M_at	transferrin receptor	Tfrc	Mm.28683	GO:0006879|GO:0006897|GO:0005576|GO:0005768|GO:0005768|GO:0005886|GO:0016020|GO:0016021|GO:0016023|GO:0016023|GO:0048471|GO:0004872|GO:0004998|GO:0005381	Housekeeping gene	0.00866127	0.15534	0.19958	0.943481	0.269352	0.424612	0.373498	0.328345	0.164837	0.152655	-0.00738144	0.211788	-0.234002	0.0295959				22042
1426470_at	TATA box binding protein	Tbp	Mm.244820	GO:0006350|GO:0006355|GO:0006367|GO:0000120|GO:0005634|GO:0005634|GO:0005667|GO:0005669|GO:0005669|GO:0003677|GO:0003677|GO:0003700|GO:0003702|GO:0005488|GO:0005515	Housekeeping gene	-0.115957	0.235624	0.054028	-0.208241	0.0283527	0.127659	0.0242815	-0.331107	0.144701	-0.364952	0.135021	0.326033	-0.0563097	-0.404745	chr17	15204864	15222790	21374
1451307_at	mitochondrial ribosomal protein L14	Mrpl14	Mm.379158	GO:0006412|GO:0006412|GO:0042254|GO:0005615|GO:0005622|GO:0005622|GO:0005739|GO:0005739|GO:0005761|GO:0005840|GO:0005840|GO:0030529|GO:0003735|GO:0003735	Housekeeping gene	-0.167179	-0.26926	-0.602036	0.13857	-0.660286	-0.648022	0.504097	0.442178	-0.623261	-0.71661	0.322167	0.0295877	0.293041	-0.644796	chr17	45149909	45162261	68463	ENSMUSG00000023939
1425260_at	albumin	Alb	Mm.16773	GO:0006810|GO:0009267|GO:0019836|GO:0043066|GO:0051659|GO:0005576|GO:0005615|GO:0005615|GO:0005737|GO:0043234|GO:0003677|GO:0005507|GO:0005515|GO:0008144|GO:0008289|GO:0015643|GO:0019825|GO:0022857|GO:0030170|GO:0046872	Housekeeping gene	-0.0487466	-0.87876	-0.718873	0.360741	0.0692534	0.0611553	0.540181	0.374283	0.059835	-0.0740223	0.224501	0.34292	0.084373	-0.651794	chr5	91536114	91551797	11657	ENSMUSG00000029368
1423221_at	tubulin, beta 4	Tubb4	Mm.7420	GO:0007017|GO:0007018|GO:0030030|GO:0051258|GO:0005874|GO:0005929|GO:0043234|GO:0000166|GO:0003924|GO:0005198|GO:0005200|GO:0005525	Housekeeping gene	-0.10576	-0.747331	-0.4456	0.153351	0.147311	-0.0930185	0.21639	0.116589	-0.0559192	-0.00449467	-0.0978365	0.42644	-0.252017	-0.0765858	chr17	56765318	56772531	22153	ENSMUSG00000062591
1444214_at	tubulin, beta 1	Tubb1	Mm.458353	GO:0007017|GO:0051225|GO:0005200	Housekeeping gene	-0.0660095	-0.396007	-0.35274	-0.0664768	0.151194	-0.114583	0.0702443	0.0251636	-0.471364	-0.330579	0.184216	0.176267	-0.202345	-0.15814	chr2	174101785	174102318	545486
LR values relative to Sca-1Neg average are indicated
